# Supplementary material for: LncRNA SNHG5 Suppresses Cell Migration and Invasion of Human Lung Adenocarcinoma via Regulation of Epithelial-Mesenchymal Transition
Source: J Oncol. 2023 Jan 19;2023:3335959. doi: 10.1155/2023/3335959 (PMC9879674; doi:10.1155/2023/3335959)
Supplement: Supplementary Materials — Supplementary table 1. Interaction between Cisplatin and SNHG5. Supplementary figure 1. Correlation between SNHG5 and popular LAD clinical biomarkers. A P-value of 0.05 was used for significance determination. [file 3335959.f1.zip]

Archive with 2 entries (2 files):
- Supplementary table 1.doc
- Supplymentary Figure 1.eps
